# Supplementary material for: Adapting the Cultural Formulation Interview for the Military
Source: Atypon-hosted journal article supplement (doi:10.1176/appi.ps.202100523), 2022-02-23
Supplement: appi.ps.202100523.ds001.pdf [file appi.ps.202100523.ds001.pdf]

## Appendix: MESH Terms

### Ovid MEDLINE:

1. ((military or veteran\*) adj5 (culture or cultural)).ti,ab.
2. (assessment\* or evaluation\* or history or interview\*).ti,ab.
3. limit 3 to (english language and yr="2007 -Current")

### PsycINFO:

1. ((military or veteran\*) adj5 (culture or cultural)).ti,ab.
2. (assessment\* or evaluation\* or history or interview\*).ti,ab.
3. 1 and 2
4. limit 3 to (english language and ("0110 peer-reviewed journal" or "0200 book") and yr="2007 -Current")

### Embase:

1. ((military OR veteran\*) NEAR/5 (culture OR cultural)):ab,ti
2. assessment\*:ab,ti OR evaluation\*:ab,ti OR history:ab,ti OR interview\*:ab,ti
3. #1 AND #2 AND [2007-2017]/py AND ([article]/lim OR [article in press]/lim OR [editorial]/lim OR [review]/lim) AND [english]/lim

### Scopus:

- TITLE-ABS((military OR veteran\*) W/5 (culture OR cultural)) AND TITLE-ABS(assessment\* OR evaluation\* OR history OR interview\*) AND PUBYEAR > 2006
1. Limits: English language
  2. Exclude: Conference Proceedings, Note, Letter

### Web of Science:

TOPIC: ((military OR veteran\*) NEAR/5 (culture OR cultural)) AND TOPIC: (assessment\* OR evaluation\* OR history OR interview\*) AND LANGUAGE:(English)

Refined by: DOCUMENT TYPES: ( ARTICLE OR BOOK CHAPTER OR REVIEW OR EDITORIAL MATERIAL )

*Indexes=SCI-EXPANDED, CPCI-S, CPCI-SSH, BKCI-S, BKCI-SSH, CCR-EXPANDED, IC Timespan=2007-2019*

PRISMA CHART

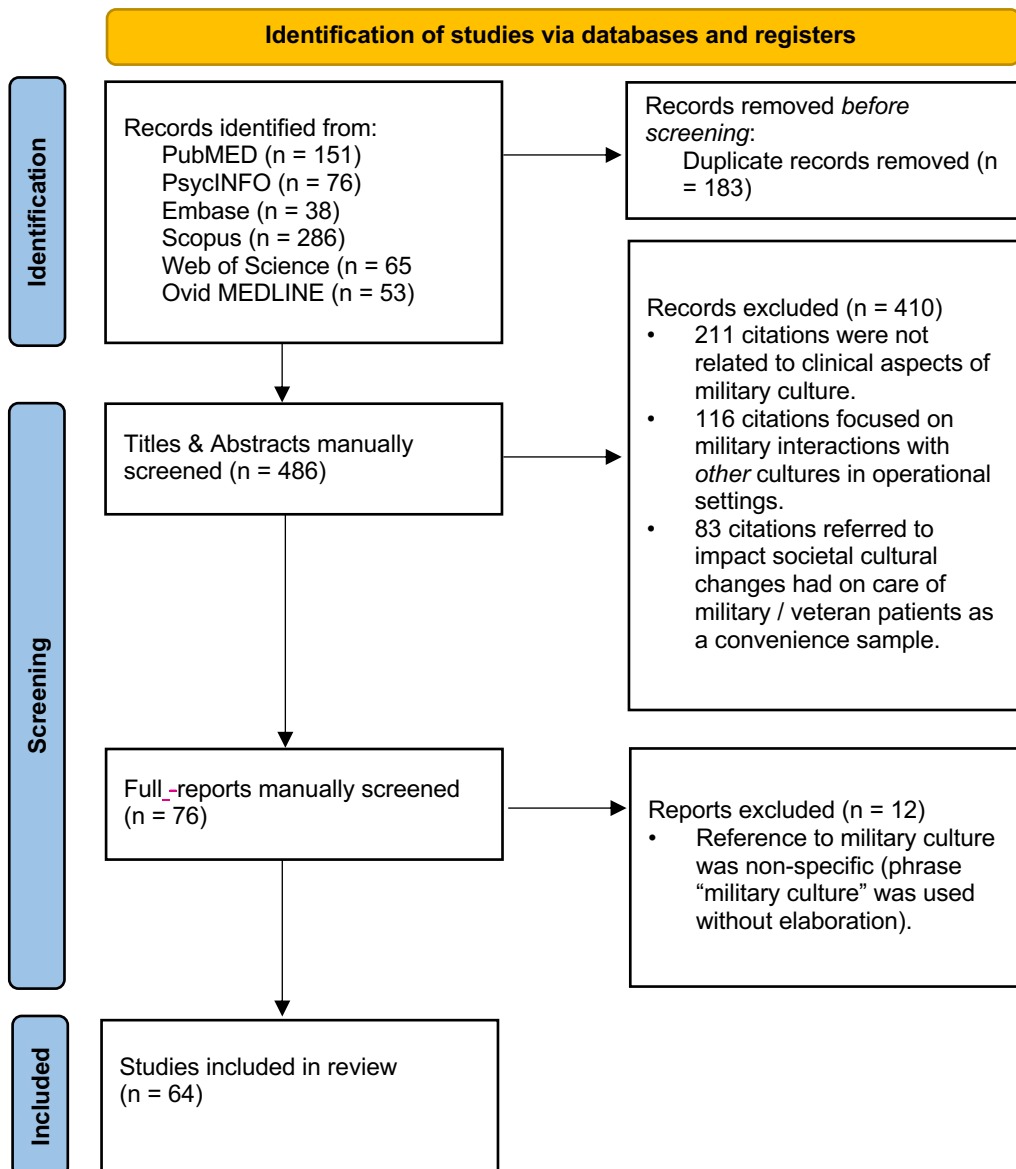







| Domain                             | Related Clinical Questions found in the Literature                                                                                                                                                                                                                                                                                                                                                                                                                                                                                                                                                                                                                                                                                                                                                                                                                                                                                                                                                                                                                                                                                                                                                                                                                                                                                                                                                                                                                                                                                                                                                                                                                                                                                                                                                                                                                                                                                                                                                                                                                                                                                                                                                                                                                                                                                                                                                                                                                                                                                                                                                                                                                                                                                                                                                                                                                                                                                                                                                                                                        |
|------------------------------------|-----------------------------------------------------------------------------------------------------------------------------------------------------------------------------------------------------------------------------------------------------------------------------------------------------------------------------------------------------------------------------------------------------------------------------------------------------------------------------------------------------------------------------------------------------------------------------------------------------------------------------------------------------------------------------------------------------------------------------------------------------------------------------------------------------------------------------------------------------------------------------------------------------------------------------------------------------------------------------------------------------------------------------------------------------------------------------------------------------------------------------------------------------------------------------------------------------------------------------------------------------------------------------------------------------------------------------------------------------------------------------------------------------------------------------------------------------------------------------------------------------------------------------------------------------------------------------------------------------------------------------------------------------------------------------------------------------------------------------------------------------------------------------------------------------------------------------------------------------------------------------------------------------------------------------------------------------------------------------------------------------------------------------------------------------------------------------------------------------------------------------------------------------------------------------------------------------------------------------------------------------------------------------------------------------------------------------------------------------------------------------------------------------------------------------------------------------------------------------------------------------------------------------------------------------------------------------------------------------------------------------------------------------------------------------------------------------------------------------------------------------------------------------------------------------------------------------------------------------------------------------------------------------------------------------------------------------------------------------------------------------------------------------------------------------------|
| <b>Civilian / Military Gap</b>     | <ul style="list-style-type: none"> <li>- Have you ever served in the military? (Burgo-Black)</li> <li>- Have you served in the military? (Conard PLA et al)</li> <li>- Have you or someone in your immediate family served in the military? (WL Brim)</li> <li>- Have you ever been a SM? Are you a family member of a SM? (Straits-Tröster et al)</li> <li>- Have you or anyone in your family ever served? (PLA Conard)</li> <li>- Have you served? Has someone in your family served? (Maloocco G)</li> <li>- Ask if patient is a veteran (Vest)</li> <li>- Have you ever served in the Military? (Conard, Armstrong)</li> <li>- Have you, your spouse, your children, or your parents ever served in the military? Would it be okay if we talked more about that? (Meyer EG)</li> <li>- Military affiliation, how long they have served. (LBF Slone, Matthew, Thompson, Barbara)</li> <li>- Tell me about your military experience. (JK Hsu, Bethany R)*</li> </ul>                                                                                                                                                                                                                                                                                                                                                                                                                                                                                                                                                                                                                                                                                                                                                                                                                                                                                                                                                                                                                                                                                                                                                                                                                                                                                                                                                                                                                                                                                                                                                                                                                                                                                                                                                                                                                                                                                                                                                                                                                                                                                   |
| <b>Language</b>                    | <ul style="list-style-type: none"> <li>- What does that [word/phrase] mean? (Meyer EG)</li> </ul>                                                                                                                                                                                                                                                                                                                                                                                                                                                                                                                                                                                                                                                                                                                                                                                                                                                                                                                                                                                                                                                                                                                                                                                                                                                                                                                                                                                                                                                                                                                                                                                                                                                                                                                                                                                                                                                                                                                                                                                                                                                                                                                                                                                                                                                                                                                                                                                                                                                                                                                                                                                                                                                                                                                                                                                                                                                                                                                                                         |
| <b>Values</b>                      | <ul style="list-style-type: none"> <li><b>Service</b> <ul style="list-style-type: none"> <li>- What is the nature of your service? (Straits-Tröster et al)</li> <li>- How do you feel about your/their military service? How does your family feel about your/their service? (Meyer EG)</li> <li>- Where &amp; when veterans served? (RPM Cameron)</li> <li>- When and where did you serve? (JK Hsu, Bethany R)</li> </ul> </li> <li><b>Competence</b> <ul style="list-style-type: none"> <li>- None found.</li> </ul> </li> <li><b>Sacrifice</b> <ul style="list-style-type: none"> <li>- How does the compartmentalization taught in the military impact your perception of stress? (Rabb)</li> </ul> </li> <li><b>Mission</b> <ul style="list-style-type: none"> <li>- How many duty assignments did you have and where were they? (WL Brim)</li> <li>- What did you do while in the service? (JK Hsu, Bethany R)</li> </ul> </li> <li><b>Collectivism</b> <ul style="list-style-type: none"> <li>- How important is it to you to be around other veterans? (TMH Kirchen, Gayle)</li> </ul> </li> </ul>                                                                                                                                                                                                                                                                                                                                                                                                                                                                                                                                                                                                                                                                                                                                                                                                                                                                                                                                                                                                                                                                                                                                                                                                                                                                                                                                                                                                                                                                                                                                                                                                                                                                                                                                                                                                                                                                                                                                                |
| <b>Events</b>                      | <ul style="list-style-type: none"> <li><b>Deployment</b> <ul style="list-style-type: none"> <li>- Tell me about your experience while deployed? (Smith, Gala)</li> <li>- Were you ever deployed? (WL Brim)</li> <li>- What was the most rewarding part of deployment? (WL Brim)</li> <li>- What was the most difficult part of deployment? (WL Brim)</li> <li>- When did you deploy? Where? (WL Brim)</li> <li>- How many times did you deploy and how long were the deployments? (WL Brim)</li> <li>- What were your duties in theater? (WL Brim)</li> <li>- What is the possibility that you will be deployed again? (WL Brim)</li> <li>- How long was service member in the war? (ELC Weiss)</li> <li>- Did you/they ever deploy? When and where? What was it like for you? (Meyer EG)</li> <li>- What their duties were while deployed?. (RPM Cameron)</li> <li>- How many times they have been deployed and how long ago. (LBF Slone, Matthew, Thompson, Barbara)</li> </ul> </li> <li><b>Reintegration</b> <ul style="list-style-type: none"> <li>- Many prior service members report that adjusting to civilian life can be complicated, what challenges, if any, have you experienced with adjusting to civilian culture? (LMT Dennesson et al)</li> <li>- What if any issues have you been dealing with since your return? (Smith, Gala)</li> <li>- Difficulties with redeployment? (Rabb)</li> <li>- Is there an emotional armour that you used while deployed that isn't working well back home?(Rabb)</li> <li>- Is it hard being separated from battle buddies after redeployment? (Rabb)</li> <li>- Is there a lack of authenticity after coming back from deployment in civilian life? (Rabb)</li> <li>- How was coming home from deployment, was it different than you expected? (WL Brim)</li> </ul> </li> <li><b>Trauma</b> <ul style="list-style-type: none"> <li>- Did you see combat?/How often were you "outside the wire"? (WL Brim)</li> <li>- Were you exposed to blasts while deployed? (WL Brim)</li> <li>- What was your exposure to death of unit members, enemy combatants, or civilians? (WL Brim)</li> <li>- Do you feel like there are any lasting physical or psychological effects of your exposure to these potentially traumatic events? (WL Brim)</li> <li>- Did the veteran witness death of injury of others? Were they captured by the enemy? Were they tortured? (ELC Weiss)</li> <li>- Whether they were exposed to combat, enemy fire, or casualties. Whether veteran was ever wounded, injured, or hospitalized. Whether they were ever a POW?. (RPM Cameron)</li> <li>- Did you see combat, enemy fire, or casualties? (JK Hsu, Bethany R)</li> <li>- Were you wounded, injured, or hospitalized? (JK Hsu, Bethany R)</li> <li>- Did you ever become ill while you were in the service? (JK Hsu, Bethany R)</li> <li>- Were you a prisoner of war? (JK Hsu, Bethany R)</li> <li>- Have you ever experienced physical, emotional, or sexual harassment or trauma? (JK Hsu, Bethany R)</li> </ul> </li> </ul> |
| <b>Structural Organization</b>     | <ul style="list-style-type: none"> <li><b>Hierarchy</b> <ul style="list-style-type: none"> <li>- Rank (e.g., enlisted, officer)? (JK Hsu, Bethany R)</li> <li>- What was your rank? (WL Brim)</li> </ul> </li> <li><b>Order</b> <ul style="list-style-type: none"> <li>- None found.</li> </ul> </li> <li><b>Structure</b> <ul style="list-style-type: none"> <li>- None found.</li> </ul> </li> </ul>                                                                                                                                                                                                                                                                                                                                                                                                                                                                                                                                                                                                                                                                                                                                                                                                                                                                                                                                                                                                                                                                                                                                                                                                                                                                                                                                                                                                                                                                                                                                                                                                                                                                                                                                                                                                                                                                                                                                                                                                                                                                                                                                                                                                                                                                                                                                                                                                                                                                                                                                                                                                                                                    |
| <b>Individual Social Variables</b> | <ul style="list-style-type: none"> <li><b>Family</b> <ul style="list-style-type: none"> <li>- Has preparing for deployment (expectation of military/unpredictability/short timeline) caused any arguments / difficulties in your relationships/family? (Rabb)</li> <li>- What was the impact of military service on your family? (WL Brim)</li> <li>- What was the impact of deployment on family? (WL Brim)</li> <li>- Are you a family member of a SM? (Straits-Tröster et al)</li> <li>- whether children live in a military family (AL Chandra)</li> <li>- whether military parents are on active duty or in the Guard or Reserve (AL Chandra)</li> <li>- whether children have experienced parental deployment (AL Chandra)</li> <li>- whether children live in a veteran family (AL Chandra)</li> <li>- assess support from the military environment, military peer relationships, or military academic transitions? (AL Chandra)</li> <li>- Do you feel like anything about your military service affected your relationships (friends, spouses, family) in any way positive or negative? (Zimpardo, Bruskill)</li> </ul> </li> <li><b>Gender</b> <ul style="list-style-type: none"> <li>- Did the military provide an escape for you from cultural expectations of your gender? (JM Silva)</li> </ul> </li> <li><b>Sexuality</b> <ul style="list-style-type: none"> <li>- Can you recall any incidents that made you feel uncomfortable as a gay service member? (JEL Parco et al)</li> <li>- Have you faced integrity issues as a gay service member while living under DADT? (JEL Parco et al)</li> <li>- Were your peers aware of your sexual orientation? What about your superiors? Can you recall any stories of how others viewed homosexuality (yours or in general)? (JEL Parco et al)</li> <li>- Why did you join the military, and why have you remained on active duty? (JEL Parco et al)</li> <li>- How did "don't ask, don't tell" affect you? 6. Now that DADT is gone, how might you imagine things will be different for you? (JEL Parco et al)</li> <li>- If there is one thing you'd like the world to know about what life was like as a gay service member, what would that be? (JEL Parco et al)</li> <li>- There are people who believe that homosexuality is a choice. What would you like these people to understand about homosexuality from your perspective? (JEL Parco et al)</li> </ul> </li> </ul>                                                                                                                                                                                                                                                                                                                                                                                                                                                                                                                                                                                                                 |
| <b>Structural Differentiation</b>  | <ul style="list-style-type: none"> <li><b>Branch</b> <ul style="list-style-type: none"> <li>- What branch of the service were/are you in? (WL Brim)</li> <li>- branch of service? (LBF Slone, Matthew, Thompson, Barbara)</li> <li>- Ask about branch of service (e.g., Army, Navy, Marines, Air Force), (JK Hsu, Bethany R)</li> </ul> </li> <li><b>Generations</b> <ul style="list-style-type: none"> <li>- What years did you serve? (WL Brim)</li> <li>- Importance of identifying what generation the person served and what Service. (PLA Conard, Young, Lact, Billings)</li> <li>- Where &amp; when veterans served? (RPM Cameron)</li> <li>- Ask about dates of military service, where based, and locations where posted for duty. (JK Hsu, Bethany R)</li> </ul> </li> <li><b>Active Duty or Reserve</b> <ul style="list-style-type: none"> <li>- Were you ever in the Guard or Reserve? (WL Brim)</li> <li>- If Guard or Reserve, what was the impact on your life of being deployed versus impact when you came home and returned to civilian life? (WL Brim)</li> <li>- Did you feel supported by the unit? (WL Brim)</li> </ul> </li> <li><b>Occupation</b> <ul style="list-style-type: none"> <li>- What is/was your occupation(s) in the military? (WL Brim)</li> <li>- What were the major milestones in your career? (WL Brim)</li> <li>- What did you/they do for the military? (Meyer EG)</li> <li>- MOS (Military Occupation Specialty), (JK Hsu, Bethany R)</li> </ul> </li> </ul>                                                                                                                                                                                                                                                                                                                                                                                                                                                                                                                                                                                                                                                                                                                                                                                                                                                                                                                                                                                                                                                                                                                                                                                                                                                                                                                                                                                                                                                                                                                                                  |
| <b>Barriers to Care</b>            | <ul style="list-style-type: none"> <li><b>Stigma</b> <ul style="list-style-type: none"> <li>- We recognize that it often takes a lot for folks to seek care, what barriers have you had to overcome in order to seek care of this appointment? (S Harding)</li> <li>- How do feel about accessing services? (MDM Kiernan)</li> <li>- What barriers either logistical or otherwise do you perceive with regards to seeking services? (MDM Kiernan)</li> <li>- Do you think seeking MH will make you weak, unreliable? (Hoge) (Rabb)</li> </ul> </li> <li><b>Privacy</b> <ul style="list-style-type: none"> <li>- None found.</li> </ul> </li> </ul>                                                                                                                                                                                                                                                                                                                                                                                                                                                                                                                                                                                                                                                                                                                                                                                                                                                                                                                                                                                                                                                                                                                                                                                                                                                                                                                                                                                                                                                                                                                                                                                                                                                                                                                                                                                                                                                                                                                                                                                                                                                                                                                                                                                                                                                                                                                                                                                                        |

### Comparison of Military Culture Domains with Core CFI Questions

| Domain                      | Category of Each CFI Question |   |    |    |    |    |    |    |    |    |    |    |    |    |    |    |    |
|-----------------------------|-------------------------------|---|----|----|----|----|----|----|----|----|----|----|----|----|----|----|----|
|                             | Intro                         | 1 | 2  | 3  | 4  | 5  | 6  | 7  | 8  | 9  | 10 | 11 | 12 | 13 | 14 | 15 | 16 |
| Civilian / Military Gap     | P                             |   | P  | P  | P  | P  | P  | P  | P  | P  | P  |    | P  |    | P  | P  | P  |
| Language                    |                               |   | P  |    |    |    |    |    |    |    |    |    | P  | E  |    |    | P  |
| Values                      | Service                       | P |    | P  | P  | P  | P  | P  | P  | P  | P  |    |    | P  | P  |    |    |
|                             | Competence                    | P |    | P  | P  | P  | P  | P  | P  | P  | P  |    |    | P  | P  |    |    |
|                             | Sacrifice                     | P |    | P  | P  | P  | P  | P  | P  | P  | P  |    |    | P  | P  |    |    |
|                             | Mission                       | P |    | P  | P  | P  | P  | P  | P  | P  | P  |    |    |    | P  |    |    |
|                             | Collectivism                  | P |    | P  | P  | P  | P  | P  | P  | P  | P  |    |    | P  | P  |    |    |
| Events                      | Deployment                    | P |    | P  | P  | P  | P  | P  | P  | P  |    |    |    |    | P  |    |    |
|                             | Reintegration                 | P |    | P  | P  | P  | P  | P  | P  | P  |    |    |    |    | P  |    |    |
|                             | Trauma                        | P |    | P  | P  | P  | P  | P  | P  | P  |    |    |    |    | P  |    |    |
| Structural Organization     | Hierarchy                     | P |    | P  | P  | P  | P  | P  | P  | P  |    |    |    |    | P  |    |    |
|                             | Order                         | P |    | P  | P  | P  | P  | P  | P  | P  |    |    |    |    | P  |    |    |
|                             | Structure                     | P |    | P  | P  | P  | P  | P  | P  | P  |    |    |    |    | P  |    |    |
| Individual Social Variables | Family                        | P |    | P  | P  | P  | P  | P  | P  | P  |    |    |    |    | P  |    |    |
|                             | Gender                        | P |    | P  | P  | P  | P  | P  | P  | P  |    |    |    | E  | P  |    |    |
|                             | Sexuality                     | P |    | P  | P  | P  | P  | P  | P  | P  |    |    |    | E  | P  |    |    |
| Structural Differentiation  | Branch                        | P |    | P  | P  | P  | P  | P  | P  | P  |    |    |    |    | P  |    |    |
|                             | Generations                   | P |    | P  | P  | P  | P  | P  | P  | P  |    |    |    |    | P  |    |    |
|                             | Active Duty or Reserve        | P |    | P  | P  | P  | P  | P  | P  | P  |    |    |    |    | P  |    |    |
|                             | Occupation                    | P |    | P  | P  | P  | P  | P  | P  | P  |    |    |    |    | P  |    |    |
| Barriers to Care            | Stigma                        | P |    | P  | P  | P  | P  | P  | P  | P  |    |    |    | E  | P  |    |    |
|                             | Privacy                       | P |    | P  | P  | P  | P  | P  | P  | P  |    |    |    | E  | P  |    |    |
|                             | 21                            | 0 | 22 | 21 | 21 | 21 | 21 | 21 | 21 | 21 | 1  | 0  | 2  | 4  | 21 | 1  | 2  |

Key:  
 - Blank: Component unrelated/not applicable (Category A)  
 - E: Component fully elicits domain (Category B)  
 - P: Component partially elicits domain (Category C)
